# Supplementary material for: Characterization of the Cadherin–Catenin Complex of the Sea Anemone Nematostella vectensis and Implications for the Evolution of Metazoan Cell–Cell Adhesion
Source: PubMed Central journal article supplement — Mol Biol Evol. 2016 Apr 28;33(8):2016–29. doi: 10.1093/molbev/msw084 (PMC4948710; doi:10.1093/molbev/msw084), 2016-04-28
Supplement: supp_msw084_SupplementaryFile1.pdf [file supp_msw084_SupplementaryFile1.pdf]

N-terminal Domain (dimerization and β-Catenin binding)

α-Catenin Domains
Nvectensis\_alpha-catenin/1-1274
Mmusculus\_alphaE-catenin/1-906
Drerio\_alphaE-catenin/1-907
Celegans\_alpha-catenin/1-927
Dmelanogaster\_alpha-catenin/1-917

α-Catenin Domains

Nvectensis\_alpha-catenin/1-1274
Mmusculus\_alphaE-catenin/1-906
Drerio\_alphaE-catenin/1-907
Celegans\_alpha-catenin/1-927
Dmelanogaster\_alpha-catenin/1-917

α-Catenin Domains

Nvectensis\_alpha-catenin/1-1274
Mmusculus\_alphaE-catenin/1-906
Drerio\_alphaE-catenin/1-907
Celegans\_alpha-catenin/1-927
Dmelanogaster\_alpha-catenin/1-917

α-Catenin Domains

Nvectensis\_alpha-catenin/1-1274
Mmusculus\_alphaE-catenin/1-906
Drerio\_alphaE-catenin/1-907
Celegans\_alpha-catenin/1-927
Dmelanogaster\_alpha-catenin/1-917

α-Catenin Domains

Nvectensis\_alpha-catenin/1-1274
Mmusculus\_alphaE-catenin/1-906
Drerio\_alphaE-catenin/1-907
Celegans\_alpha-catenin/1-927
Dmelanogaster\_alpha-catenin/1-917

α-Catenin Domains

Nvectensis\_alpha-catenin/1-1274
Mmusculus\_alphaE-catenin/1-906
Drerio\_alphaE-catenin/1-907
Celegans\_alpha-catenin/1-927
Dmelanogaster\_alpha-catenin/1-917

α-Catenin Domains

Nvectensis\_alpha-catenin/1-1274
Mmusculus\_alphaE-catenin/1-906
Drerio\_alphaE-catenin/1-907
Celegans\_alpha-catenin/1-927
Dmelanogaster\_alpha-catenin/1-917

α-Catenin Domains

Nvectensis\_alpha-catenin/1-1274
Mmusculus\_alphaE-catenin/1-906
Drerio\_alphaE-catenin/1-907
Celegans\_alpha-catenin/1-927
Dmelanogaster\_alpha-catenin/1-917

α-Catenin Domains

Nvectensis\_alpha-catenin/1-1274
Mmusculus\_alphaE-catenin/1-906
Drerio\_alphaE-catenin/1-907
Celegans\_alpha-catenin/1-927
Dmelanogaster\_alpha-catenin/1-917

α-Catenin Domains

Nvectensis\_alpha-catenin/1-1274
Mmusculus\_alphaE-catenin/1-906
Drerio\_alphaE-catenin/1-907
Celegans\_alpha-catenin/1-927
Dmelanogaster\_alpha-catenin/1-917

α-Catenin Domains

Nvectensis\_alpha-catenin/1-1274
Mmusculus\_alphaE-catenin/1-906
Drerio\_alphaE-catenin/1-907
Celegans\_alpha-catenin/1-927
Dmelanogaster\_alpha-catenin/1-917

α-Catenin Domains

Nvectensis\_alpha-catenin/1-1274
Mmusculus\_alphaE-catenin/1-906
Drerio\_alphaE-catenin/1-907
Celegans\_alpha-catenin/1-927
Dmelanogaster\_alpha-catenin/1-917

α-Catenin Domains

Nvectensis\_alpha-catenin/1-1274
Mmusculus\_alphaE-catenin/1-906
Drerio\_alphaE-catenin/1-907
Celegans\_alpha-catenin/1-927
Dmelanogaster\_alpha-catenin/1-917

M-Domain

N. vectensis insertion region

Conserved motif

Tail Domain (Actin-binding)

**SUPPLEMENTARY FIGURE 1 – Multiple alignment of *N. vectensis*  $\alpha$ -catenin aligned with characterized  $\alpha$ -catenin orthologs from *M. musculus*, *D. rerio*, *D. melanogaster*, and *C. elegans*.** Conserved domains shared between *N. vectensis*  $\alpha$ -catenin and bilaterian  $\alpha$ -catenins (blue bars) and the *N. vectensis* insert (green bars) are annotated. An 11 residue conserved motif within the insert is indicated (blue hashing), and a conserved phosphorylation site that is absent in *N. vectensis* is indicated (asterisk).

| <b>Ortholog</b>                          | <b>Homo-dimerization</b> | <b><math>\beta</math>-Cat. binding</b> | <b>F-actin binding</b>  | <b>Actin regulation</b>                      | <b><i>in vivo</i> requirement</b>         |
|------------------------------------------|--------------------------|----------------------------------------|-------------------------|----------------------------------------------|-------------------------------------------|
| Mammalian $\alpha$ E-Catenin             | Yes                      | Yes                                    | Homodimer               | Bundles F-actin; inhibits Arp2/3 and Cofilin | Adhesion in blastula; epidermal formation |
| <i>D. rerio</i> $\alpha$ E-Catenin       | No                       | Yes                                    | Monomer and heterodimer | Bundles F-actin                              | Epiboly and gastrulation                  |
| <i>D. melanogaster</i> $\alpha$ -Catenin | Yes                      | Yes                                    | Monomer and homodimer   | ?                                            | Embryogenesis and oogenesis               |
| <i>N. vectensis</i> $\alpha$ -Catenin    | Yes                      | Yes                                    | Monomer and Heterodimer | Inhibits Arp2/3                              | ?                                         |

**SUPPLEMENTARY TABLE 1** – A comparative summary of the properties of characterized  $\alpha$ -Catenin orthologs.
